# Supplementary material for: Pd doped SiO2 nanoparticles: an efficient recyclable catalyst for Suzuki, Heck and Sonogashira reactions
Source: Royal Society of Chemistry journal article supplement (doi:10.1039/c4ra01813c), 2014-01-01
Supplement: c4ra01813c1.pdf [file c4ra01813c1.pdf]

## Supplementary Material

### **Pd-doped SiO<sub>2</sub> nanoparticles: An efficient recyclable catalyst for Suzuki, Heck and Sonogashira reactions**

Deepali A. Kotadia,<sup>a</sup> Urmila H. Patel,<sup>b</sup> Sahaj Gandhi<sup>b</sup>, Saurabh S. Soni<sup>\*,a</sup>

<sup>a</sup> *Department of Chemistry, Sardar Patel University, Vallabh Vidyanagar 388120, Gujarat, INDIA*

<sup>b</sup> *Department of Physics, Sardar Patel University, Vallabh Vidyanagar 388120, Gujarat, INDIA*

\*Author to whom all correspondence should be address (email: soni\_b21@yahoo.co.in)  
Telephone: +91-2692-226857-Ext.216, Tele Fax: +91-2692 236475

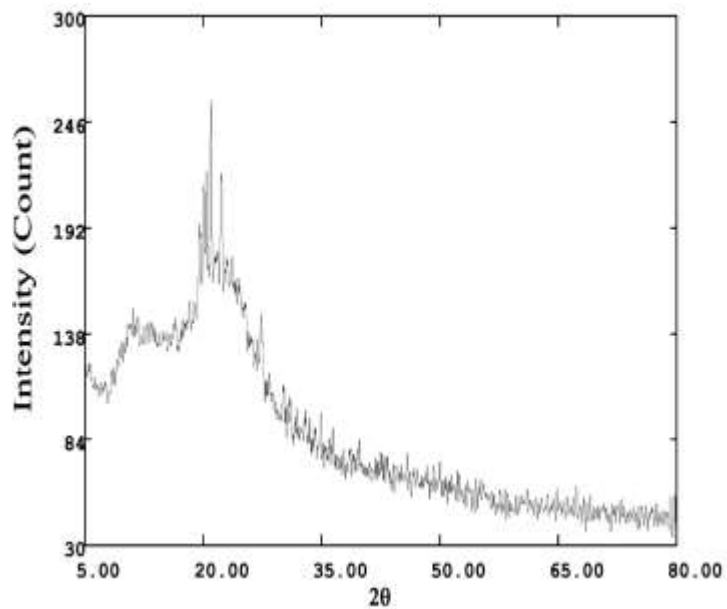

**Figure S1** Wide angle powder XRD pattern of Pd/SiO<sub>2</sub>

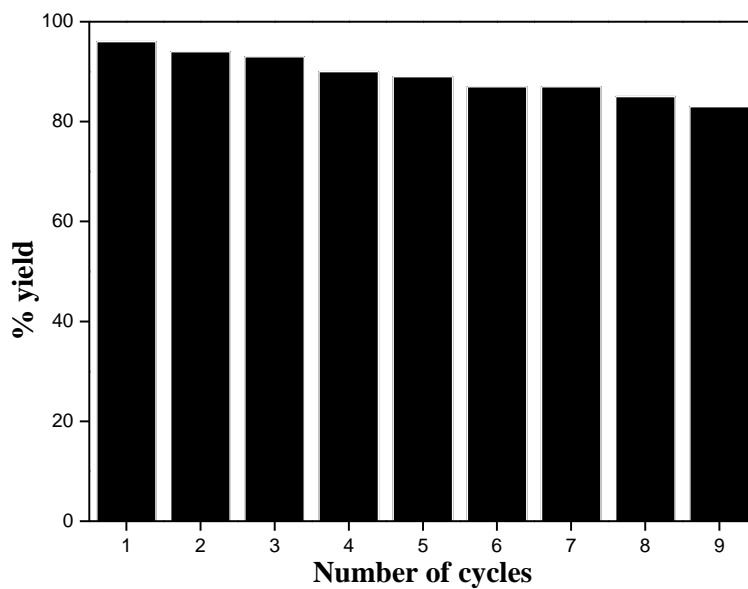

**Figure S2** Reusability Graph of Pd/SiO<sub>2</sub> for Suzuki Coupling reaction of *p*-bromoacetophenone with phenyl boronic acid

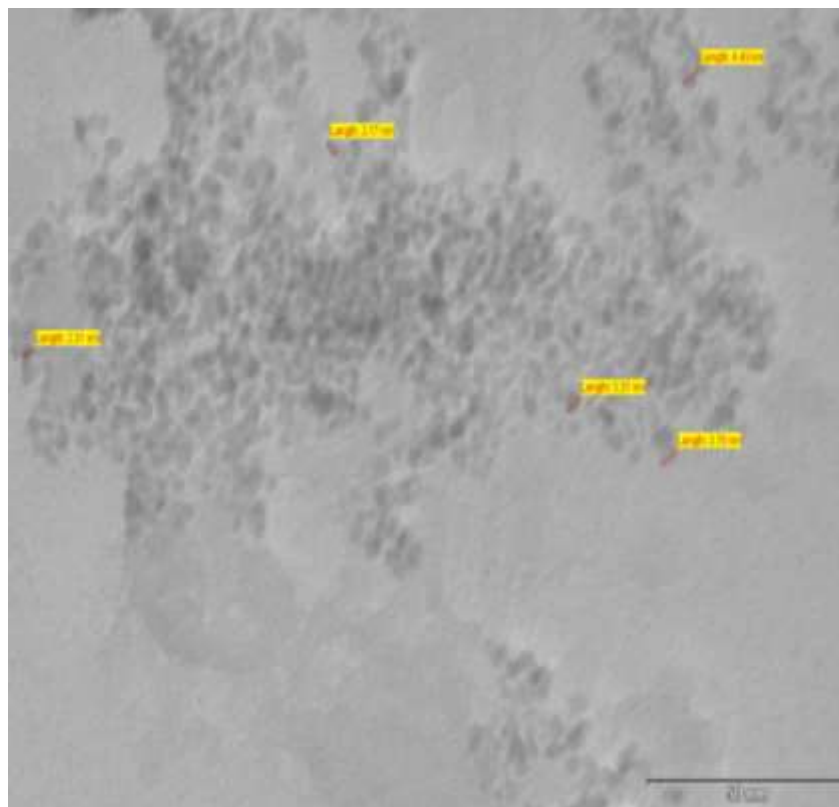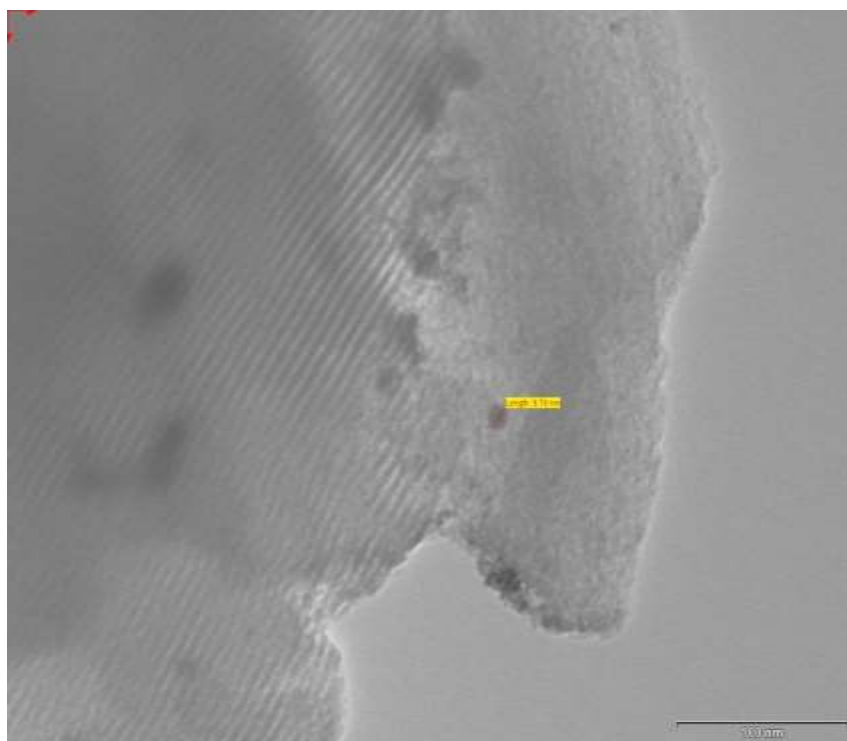

**Figure S3** TEM images of Pd/SiO<sub>2</sub> mesoporous materials (magnification of Fig. 3)

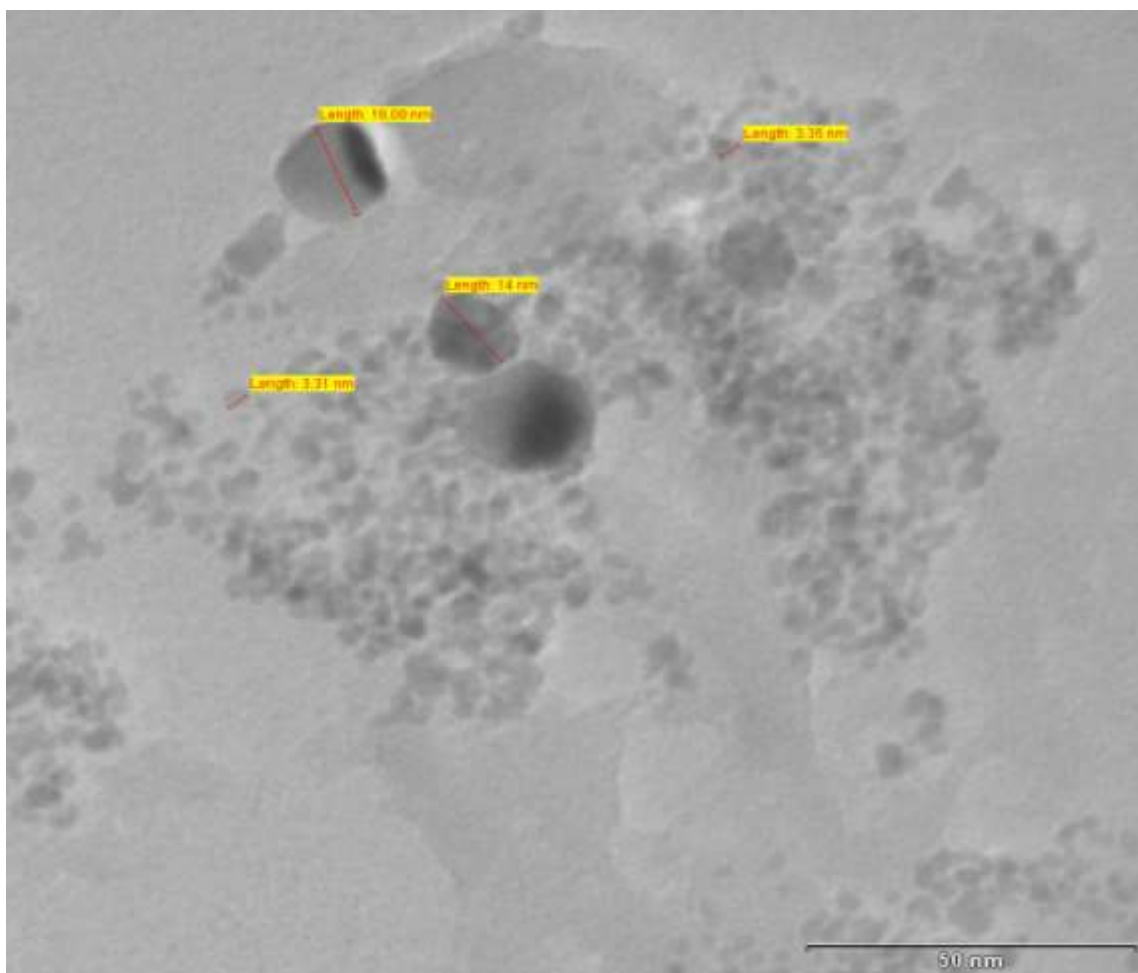

**Figure S4** TEM micrographs of reused Pd doped silica mesoporous materials

## Characterization of coupling products

| Entry             | <sup>1</sup> H NMR Spectral data's                                                                                                                                                                                                                                                   |
|-------------------|--------------------------------------------------------------------------------------------------------------------------------------------------------------------------------------------------------------------------------------------------------------------------------------|
| <b>Figure S5</b>  | <sup>1</sup> H NMR (CDCl <sub>3</sub> , δ/ppm): 2.19 (3H, Singlet, -CH <sub>3</sub> ), 7.35–7.47 (2H, Multiplet, -CH), 7.51–7.59 (2H, Multiplet, -CH), 7.61–7.65 (4H, Multiplet, -CH), 7.77 (1H, Singlet, -CH), 8.28 (1H, Singlet, -NH) (Table 3 Entry 1)                            |
| <b>Figure S6</b>  | <sup>1</sup> H NMR (CDCl <sub>3</sub> , δ/ppm): 7.41–7.49 (1H, Triplet, -CH), 7.51–7.55 (4H, Multiplet, -CH), 7.61–7.63 (1H, Triplet, -CH), 7.65–7.69 (2H, Triplet, -CH), 7.72–7.74 (2H, Triplet, -CH), 7.85–7.87 (2H, Doublet, -CH), 7.91–7.93 (2H, Doublet, -CH) (Table 3 Entry 3) |
| <b>Figure S7</b>  | <sup>1</sup> H NMR (CDCl <sub>3</sub> , δ/ppm): 7.53–7.58 (2H, Triplet, -CH), 7.78–7.80 (2H, Multiplet, -CH), 7.88–7.99 (5H, Multiplet, -CH), 8.01–8.13 (2H, Triplet, -CH), 10.11 (1H, Singlet, -CHO) (Table 3 Entry 5)                                                              |
| <b>Figure S8</b>  | <sup>1</sup> H NMR (CDCl <sub>3</sub> , δ/ppm): 1.45 (9H, Singlet, -(CH <sub>3</sub> ) <sub>3</sub> ), 6.44 (1H, Doublet, =CH), 7.57–7.64 (2H, Triplet, -CH), 7.80 (1H, Doublet, =CH), 8.07–8.10 (2H, Triplet, -CH), 11.04 (1H, Singlet, -OH) (Table 5 Entry 3)                      |
| <b>Figure S9</b>  | <sup>1</sup> H NMR (CDCl <sub>3</sub> , δ/ppm): 1.49 (9H, Singlet, -(CH <sub>3</sub> ) <sub>3</sub> ), 3.78 (3H, Singlet, -OCH <sub>3</sub> ), 6.51 (1H, Doublet, =CH), 7.63–7.68 (2H, Triplet, -CH), 7.81 (1H, Doublet, =CH), 8.08–8.14 (2H, Triplet, -CH) (Table 5 Entry 6)        |
| <b>Figure S10</b> | <sup>1</sup> H NMR (CDCl <sub>3</sub> , δ/ppm): 6.90 (2H, Doublet, -CH=CH), 7.38–7.59 (4H, Triplet, -CH), 7.71–7.79 (2H, Triplet, -CH), 7.80–7.93 (4H, Triplet, -CH) (Table 5 Entry 9)                                                                                               |
| <b>Figure S11</b> | <sup>1</sup> H NMR (CDCl <sub>3</sub> , δ/ppm): 2.62 (3H, Singlet, -OCH <sub>3</sub> ), 6.90–7.28 (3H, Triplet, -CH), 7.31–7.48 (2H, Triplet, -CH), 7.60–7.64 (2H, Triplet, -CH), 7.82–7.84 (2H, Triplet, -CH) (Table 6 Entry 1)                                                     |
| <b>Figure S12</b> | <sup>1</sup> H NMR (CDCl <sub>3</sub> , δ/ppm): 7.43–7.54 (3H, Triplet, -CH), 7.56–7.63 (4H, Triplet, -CH), 7.65–7.81 (2H, Triplet, -CH), 9.97 (1H, Singlet, -CHO) (Table 6 Entry 4)                                                                                                 |
| <b>Figure S13</b> | <sup>1</sup> H NMR (CDCl <sub>3</sub> , δ/ppm): 7.19–7.21 (3H, Triplet, -CH), 7.24–7.26 (2H, Triplet, -CH), 7.55–7.63 (2H, Triplet, -CH), 7.70–7.79 (2H, Triplet, -CH) (Table 6 Entry 6)                                                                                             |

## Suzuki Coupling products

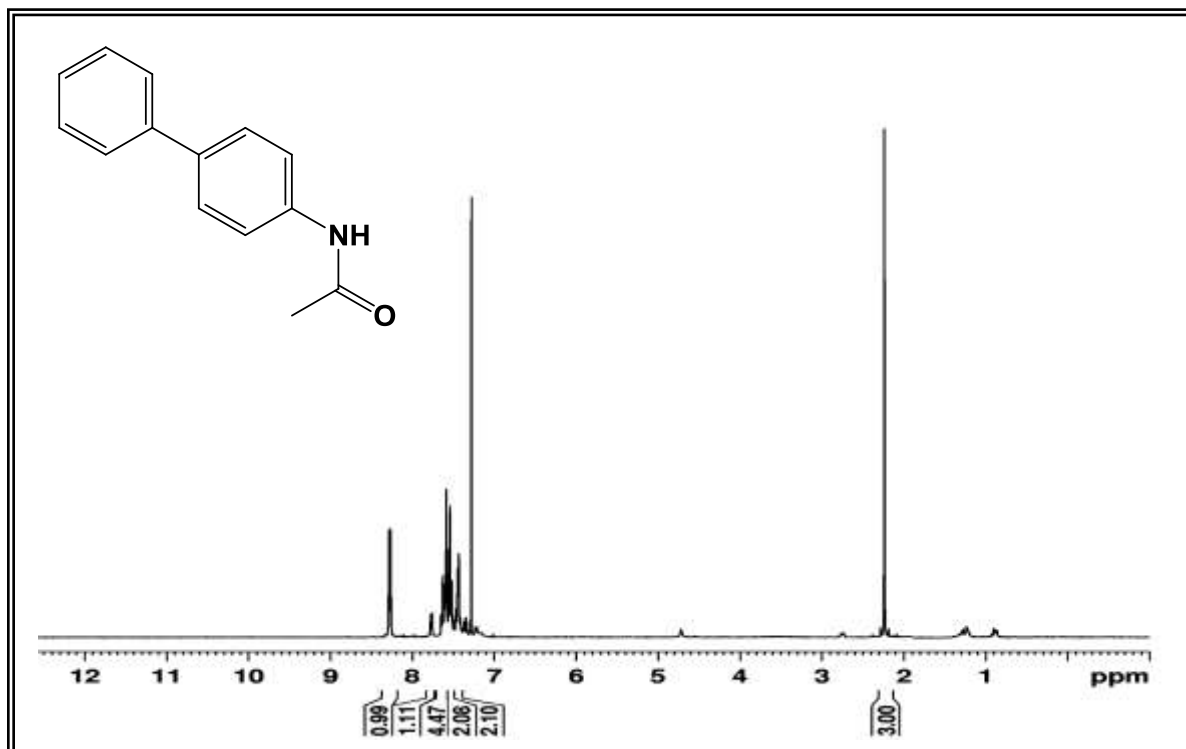

Figure S5 <sup>1</sup>H-NMR of N-(biphenyl-4-yl)acetamide

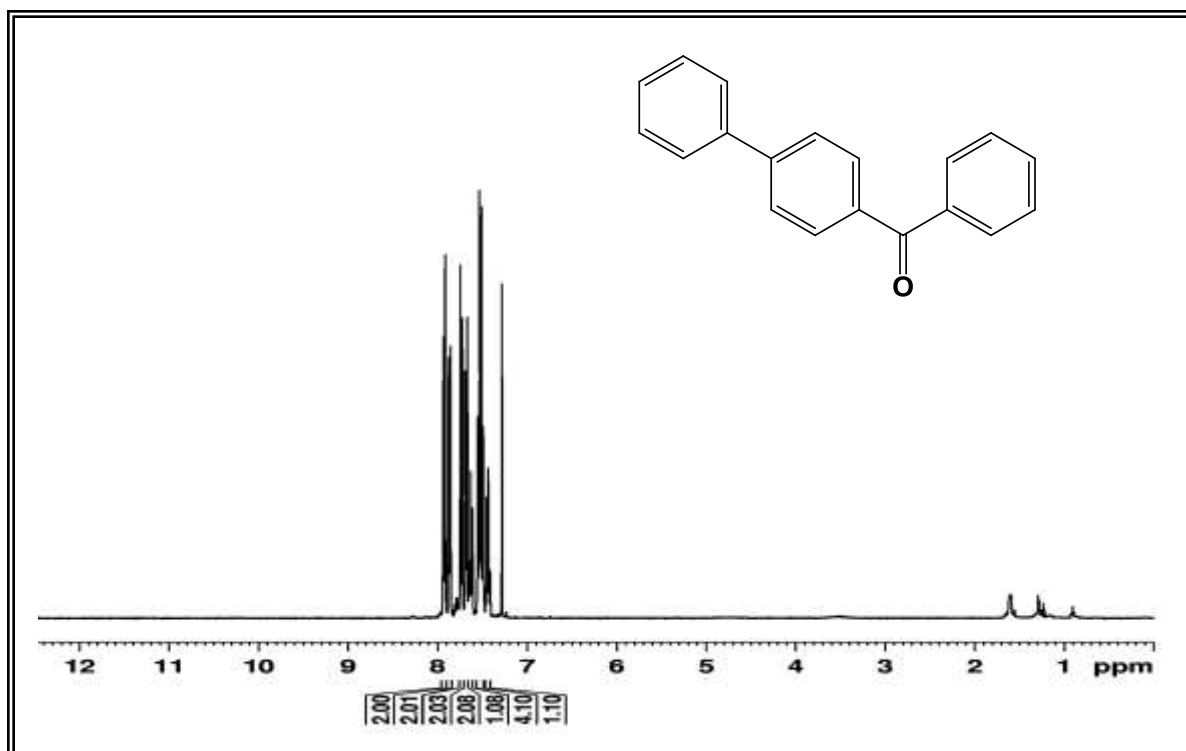

**Figure S6** <sup>1</sup>H-NMR of 4-(naphthalen-2-yl)benzaldehyde

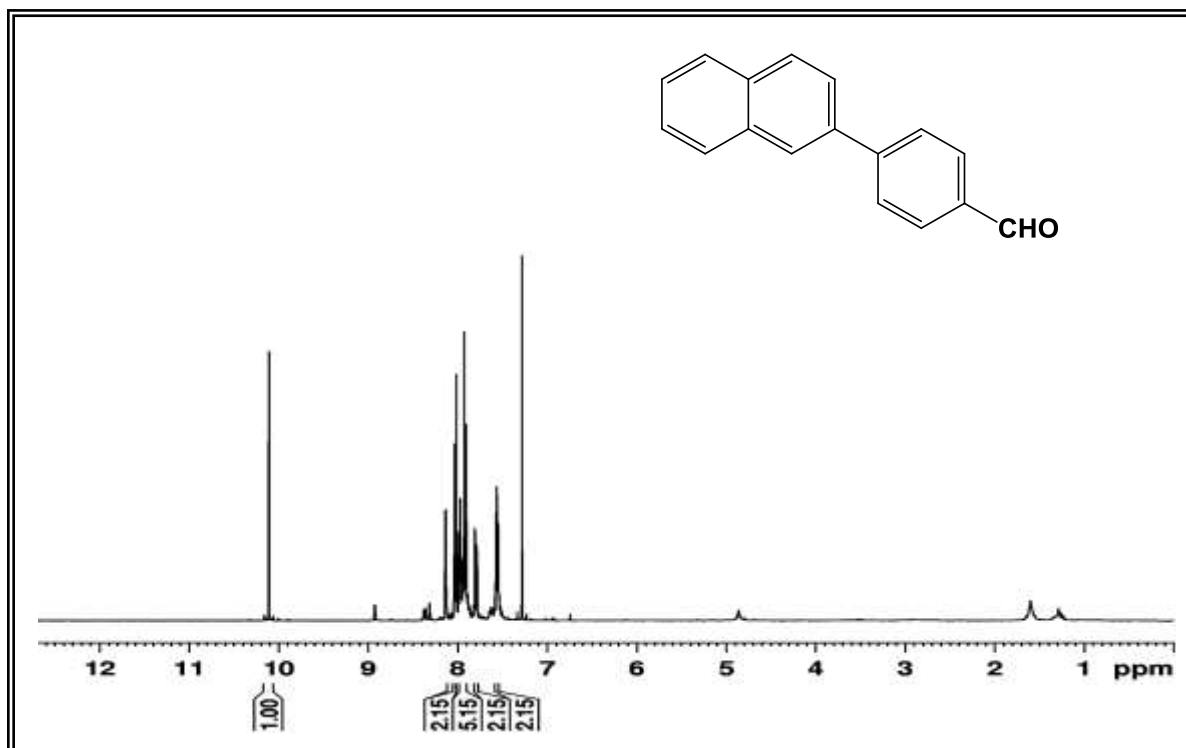

**Figure S7** <sup>1</sup>H-NMR of 4-(naphthalen-2-yl)benzaldehyde

## Heck Coupling products

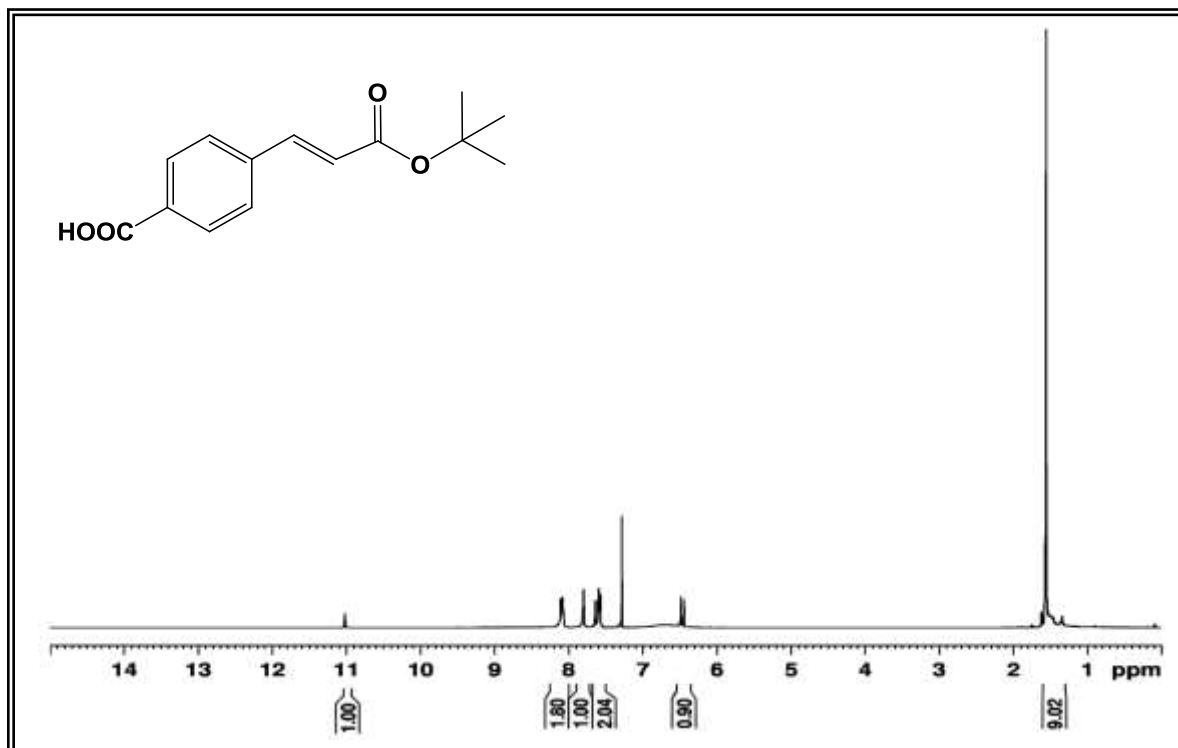

**Figure S8** <sup>1</sup>H-NMR of (E)-4-(3-tert-butoxy-3-oxoprop-1-enyl)benzoic acid

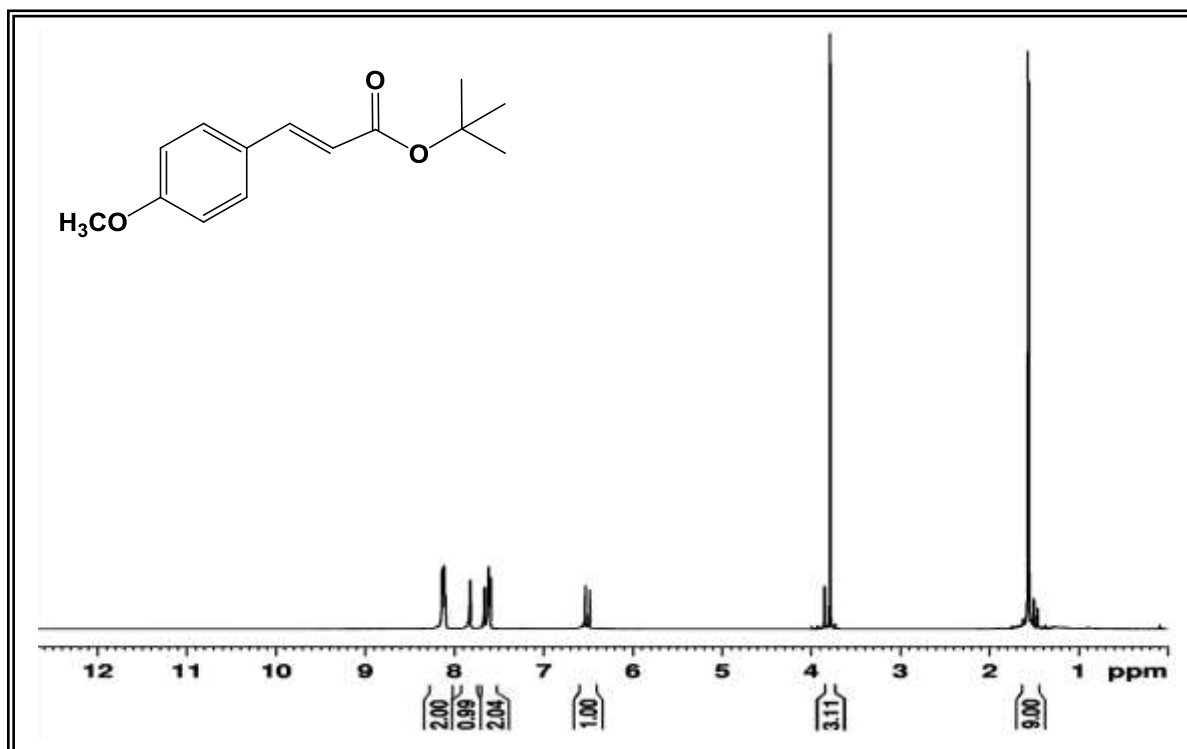

**Figure S9** <sup>1</sup>H-NMR of (E)-tert-butyl 3-(4-methoxyphenyl)acrylates



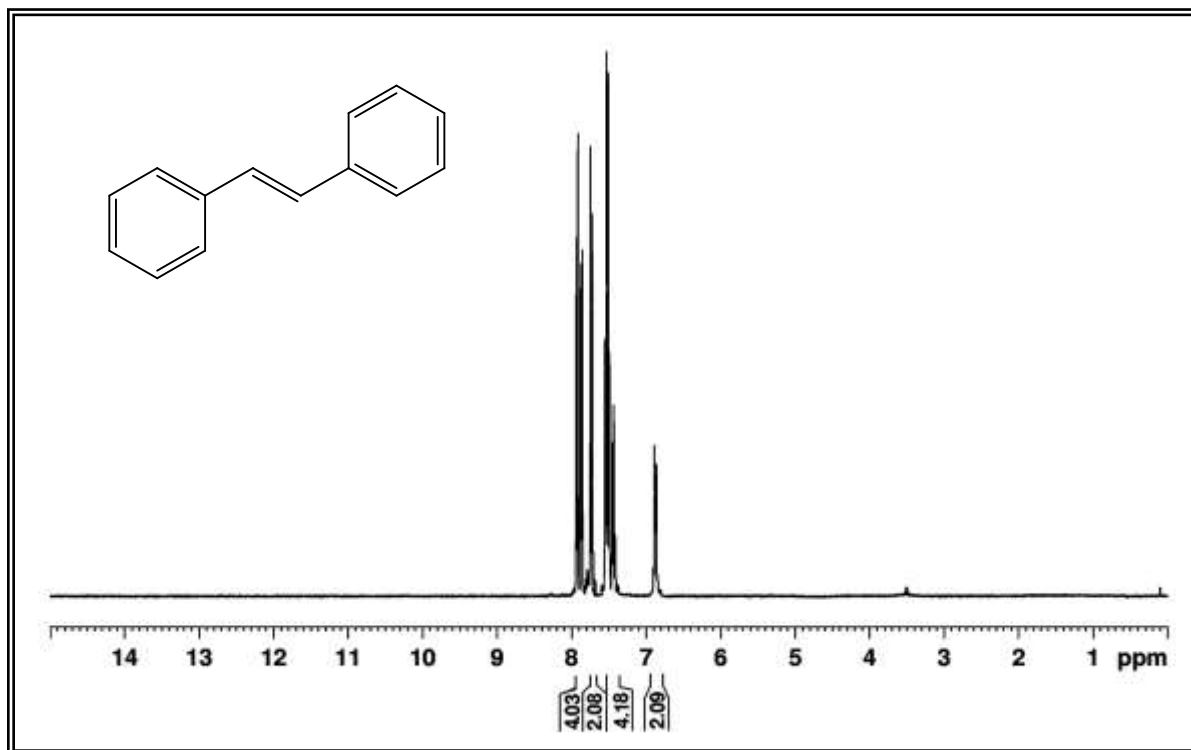

**Figure S10**  $^1\text{H-NMR}$  of (E)-1,2-diphenylethene

**Sonogashira Coupling products**

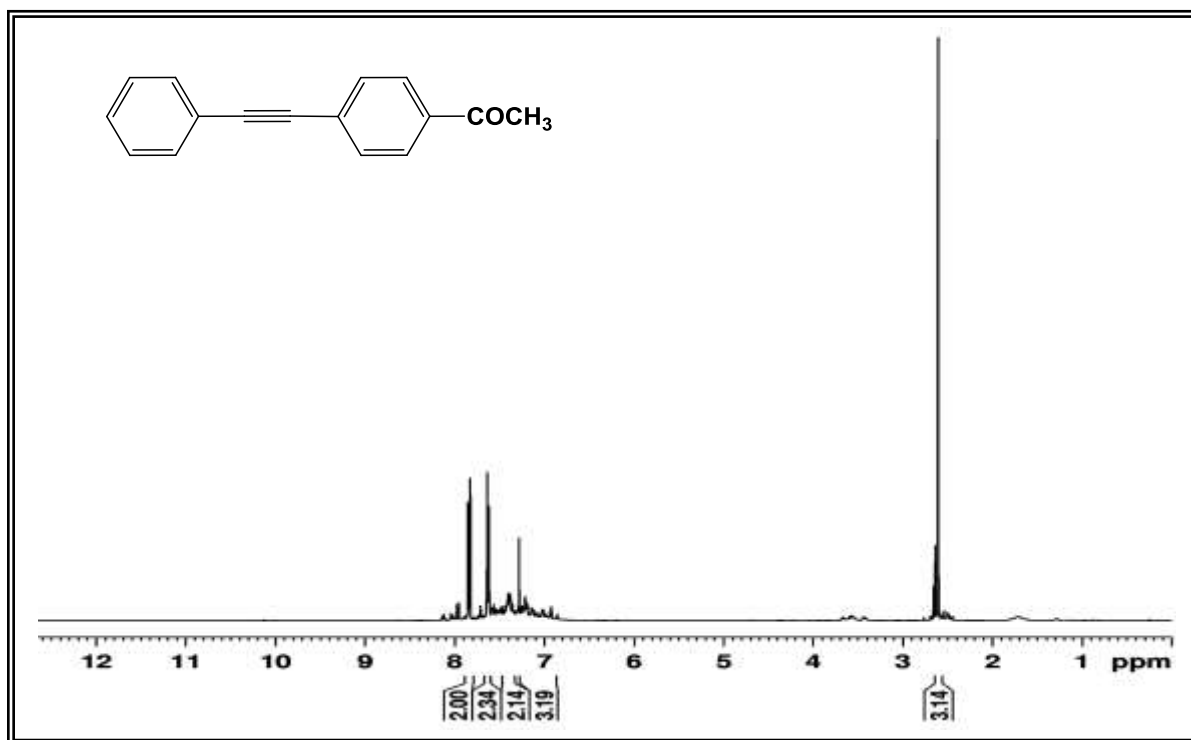

**Figure S11**  $^1\text{H-NMR}$  of 1-(4-(phenylethynyl)phenyl)ethanone

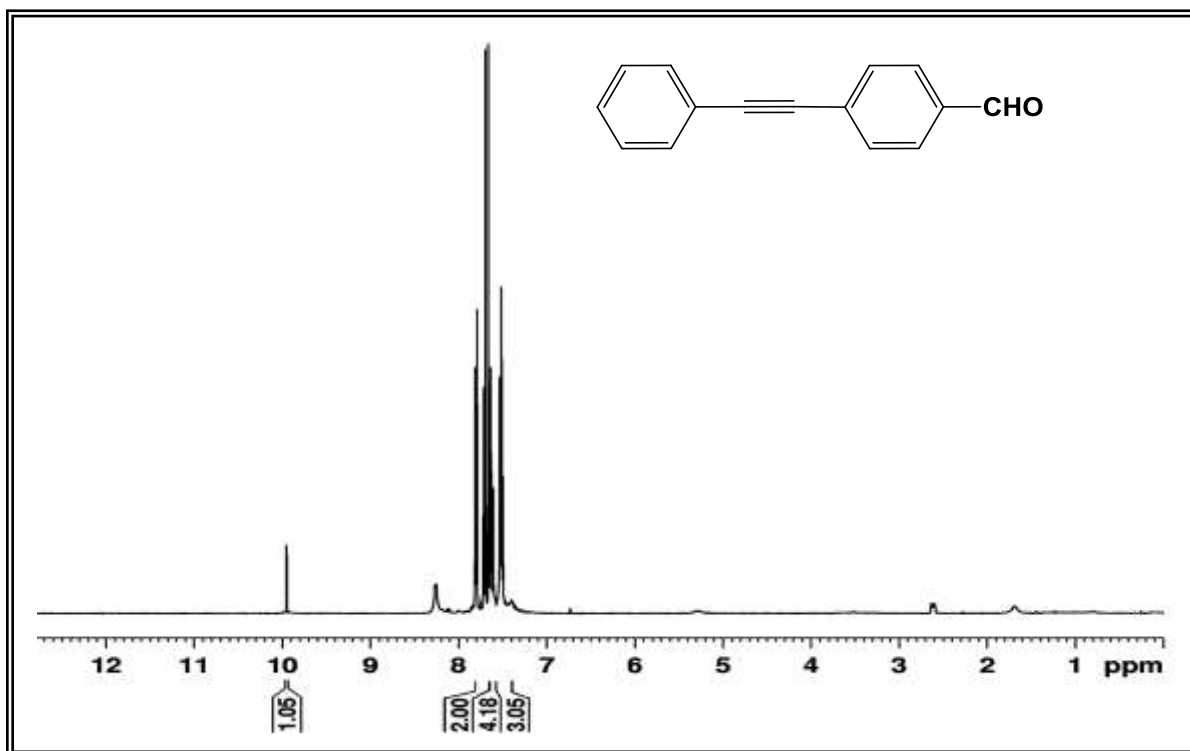

Figure S12 <sup>1</sup>H-NMR of 4-(phenylethynyl)benzaldehyde

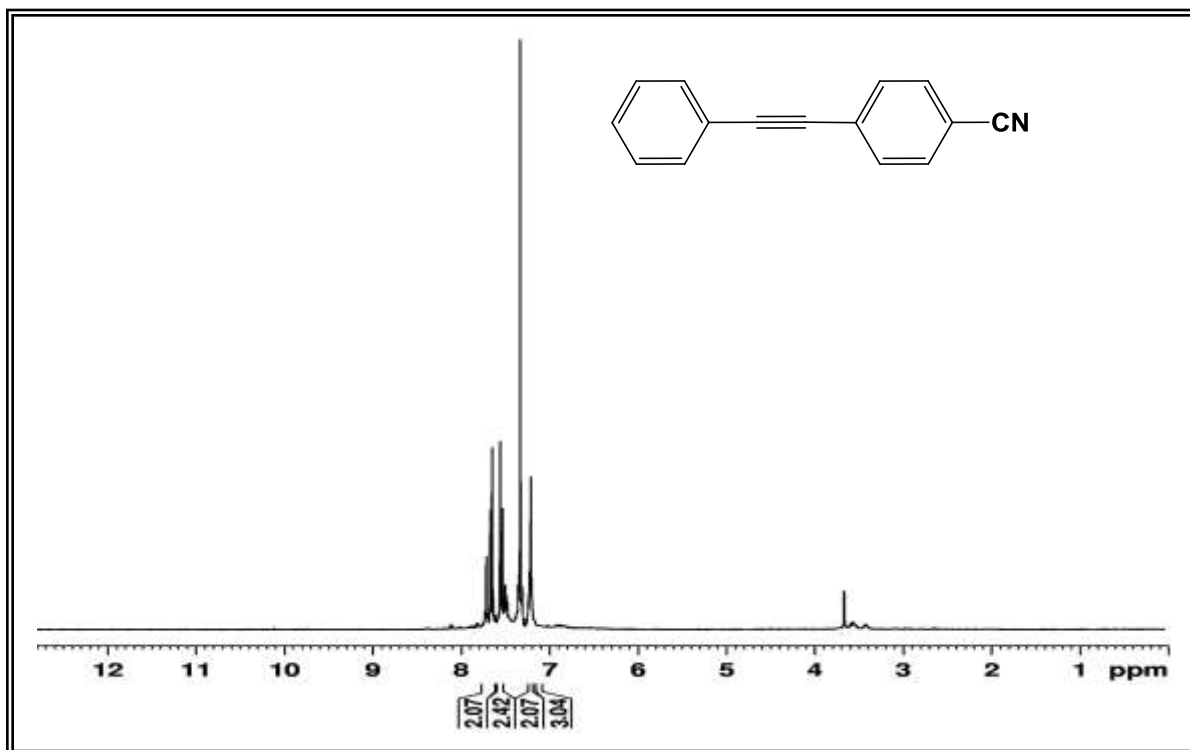

Figure S13 <sup>1</sup>H-NMR of 4-(phenylethynyl)benzonitrile
